# Supplementary material for: Delivery of DNA into Human Cells by Functionalized Lignin Nanoparticles
Source: MDPI journal article supplement (doi:10.3390/ma15010303), 2022-01-01
Supplement: s1 [file s1]

# Delivery of DNA into Human Cells by Functionalized Lignin Nanoparticles

Michael K. Riley II <sup>1</sup> and Wilfred Vermerris <sup>2,3,4,\*</sup>

<sup>1</sup> Graduate Program in Plant Molecular & Cellular Biology, University of Florida, Gainesville, FL 32610, USA; mike.riley350@gmail.com

<sup>2</sup> Department of Microbiology & Cell Science, University of Florida, Gainesville, FL 32610, USA

<sup>3</sup> UF Genetics Institute, University of Florida, Gainesville, FL 32610, USA

<sup>4</sup> Florida Center for Renewable Chemicals and Fuels, University of Florida, Gainesville, FL 32610, USA

\* Correspondence: wev@ufl.edu

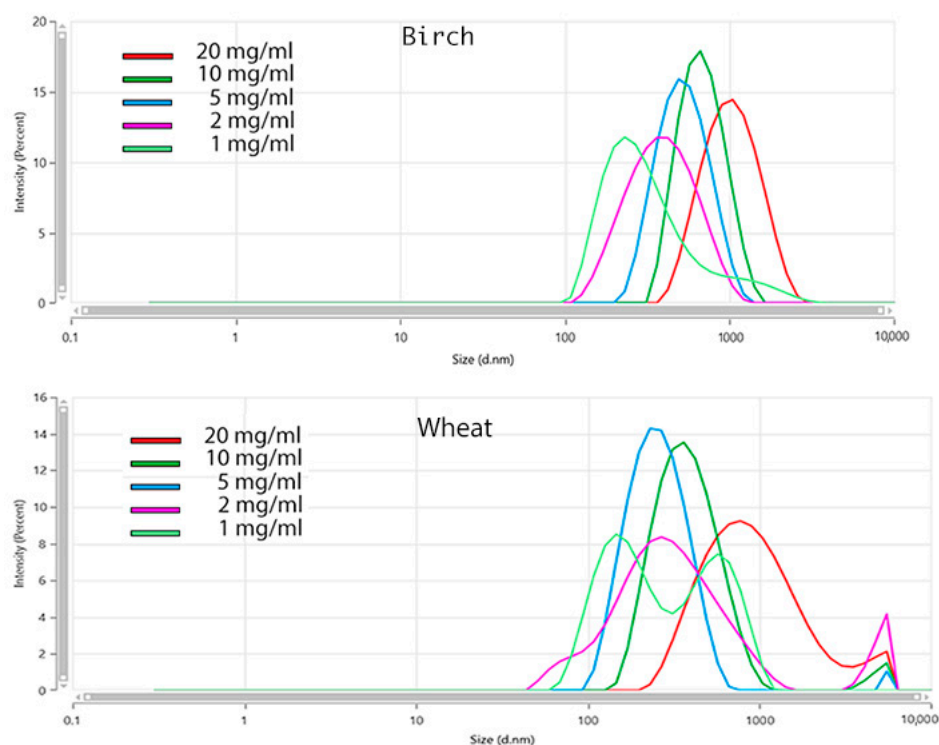

**Figure S1.** Histograms displaying the size distributions of the LNPs prepared from birch BioLignin™ (top) and wheat BioLignin™, based on the dynamic light scattering analysis shown in Figure 2B. Data obtained with the ZS Xplore software (Malvern Panalytical).

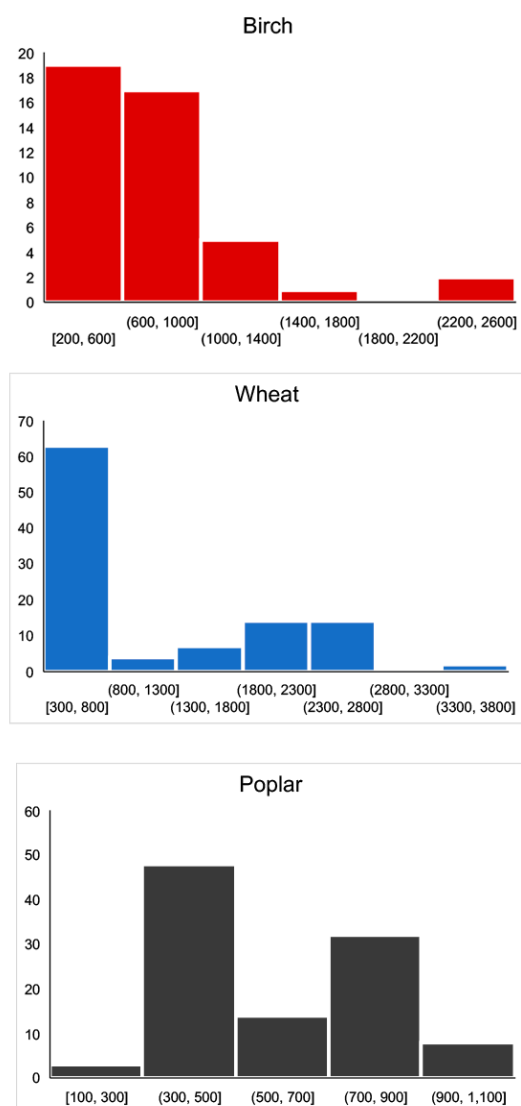

**Figure S2.** Histograms displaying the distributions of diameters of the LNPs prepared from birch BioLignin™ (top), wheat BioLignin™ (center) and poplar TGA lignin (bottom) based on analysis of the SEM images in Figure 3. The horizontal scale displays the diameter range for each bin in nanometer.
